# Supplementary material for: Proteomic Analyses Reveal that Sky1 Modulates Apoptosis and Mitophagy in Saccharomyces cerevisiae Cells Exposed to Cisplatin
Source: PubMed Central journal article supplement (PMC4139861; doi:10.3390/ijms150712573), 2014-07-15

## Supplementary Information

**Table S1.** Changes in mRNA levels observed for genes encoding proteins included in Table 1. Data are from accession GEO (GSE41094): \* + activation; – repression.

| <b>Untreated Mutant <math>\Delta skyI</math> versus Untreated Wild Type</b> |                                                                          |                                                                                  |               |
|-----------------------------------------------------------------------------|--------------------------------------------------------------------------|----------------------------------------------------------------------------------|---------------|
| <b>Gene</b>                                                                 | <b>W303-1A log<sub>2</sub> Mean <math>\pm</math> SD</b>                  | <b><math>\Delta skyI</math> log<sub>2</sub> Mean <math>\pm</math> SD</b>         | <b>FOLD *</b> |
| <i>YLR179C</i>                                                              | 7.78 $\pm$ 0.02                                                          | 7.79 $\pm$ 0.03                                                                  | 1.00          |
| <i>ACS2; YLR153C</i>                                                        | 9.24 $\pm$ 0.30                                                          | 9.61 $\pm$ 0.07                                                                  | 1.45          |
| <i>SHM2; YLR058C</i>                                                        | 9.62 $\pm$ 0.11                                                          | 9.16 $\pm$ 0.08                                                                  | -1.58         |
| <i>GUK1; YDR454C</i>                                                        | 7.93 $\pm$ 0.04                                                          | 8.35 $\pm$ 0.08                                                                  | 1.53          |
| <i>PFY1; YOR122C</i>                                                        | 9.44 $\pm$ 0.05                                                          | 10.18 $\pm$ 0.12                                                                 | 2.09          |
| <b>Wild Type Treated versus Untreated</b>                                   |                                                                          |                                                                                  |               |
| <b>Gene</b>                                                                 | <b>W303-1A log<sub>2</sub> Mean <math>\pm</math> SD</b>                  | <b>W303-1A + cisPt log<sub>2</sub> Mean <math>\pm</math> SD</b>                  | <b>FOLD *</b> |
| <i>MET6; YER091C</i>                                                        | 10.64 $\pm$ 0.14                                                         | 11.68 $\pm$ 0.03                                                                 | 2.83          |
| <i>LYS20; YDL182W</i>                                                       | 8.46 $\pm$ 0.10                                                          | 7.95 $\pm$ 0.03                                                                  | -1.66         |
| <i>ADO1; YJR105W</i>                                                        | 8.79 $\pm$ 0.10                                                          | 8.35 $\pm$ 0.06                                                                  | -1.55         |
| <i>ADH1; YOL086C</i>                                                        | 12.02 $\pm$ 0.08                                                         | 11.83 $\pm$ 0.08                                                                 | -1.20         |
| <i>ARO4; YBR249C</i>                                                        | 7.52 $\pm$ 0.14                                                          | 7.08 $\pm$ 0.04                                                                  | -1.55         |
| <b>Mutant <math>\Delta skyI</math> Treated versus Untreated</b>             |                                                                          |                                                                                  |               |
| <b>Gene</b>                                                                 | <b><math>\Delta skyI</math> log<sub>2</sub> Mean <math>\pm</math> SD</b> | <b><math>\Delta skyI</math> + cisPt log<sub>2</sub> Mean <math>\pm</math> SD</b> | <b>FOLD *</b> |
| <i>UGP1; YKL035W</i>                                                        | 11.34 $\pm$ 0.03                                                         | 11.47 $\pm$ 0.05                                                                 | 1.14          |
| <i>PRB1; YEL060C</i>                                                        | 10.55 $\pm$ 0.06                                                         | 10.91 $\pm$ 0.02                                                                 | 1.44          |
| <i>STI1; YOR027W</i>                                                        | 10.33 $\pm$ 0.07                                                         | 10.38 $\pm$ 0.05                                                                 | 1.05          |
| <i>BMH1; YER177W</i>                                                        | 10.76 $\pm$ 0.02                                                         | 10.66 $\pm$ 0.10                                                                 | -1.11         |
| <i>BMH2; YDR099W</i>                                                        | 10.34 $\pm$ 0.06                                                         | 10.43 $\pm$ 0.09                                                                 | 1.09          |
| <i>TMA19; YKL056C</i>                                                       | 10.89 $\pm$ 0.20                                                         | 10.57 $\pm$ 0.10                                                                 | -1.39         |
| <i>YLR179C</i>                                                              | 7.79 $\pm$ 0.03                                                          | 7.62 $\pm$ 0.06                                                                  | -1.19         |
| <i>GUK1; YDR454C</i>                                                        | 8.35 $\pm$ 0.08                                                          | 8.19 $\pm$ 0.04                                                                  | -1.18         |
| <i>ADO1; YJR105W</i>                                                        | 8.85 $\pm$ 0.03                                                          | 8.40 $\pm$ 0.08                                                                  | -1.57         |
| <b>Treated Mutant <math>\Delta skyI</math> versus Treated Wild Type</b>     |                                                                          |                                                                                  |               |
| <b>Gene</b>                                                                 | <b>W303-1A + cisPt log<sub>2</sub> Mean <math>\pm</math> SD</b>          | <b><math>\Delta skyI</math> + cisPt log<sub>2</sub> Mean <math>\pm</math> SD</b> | <b>FOLD *</b> |
| <i>HSP26; YBR072W</i>                                                       | 10.86 $\pm$ 0.10                                                         | 11.15 $\pm$ 0.05                                                                 | 1.33          |
| <i>AHP1; YLR109W</i>                                                        | 11.81 $\pm$ 0.04                                                         | 11.68 $\pm$ 0.08                                                                 | -1.15         |
| <i>YLR179C</i>                                                              | 7.71 $\pm$ 0.05                                                          | 7.62 $\pm$ 0.06                                                                  | -1.10         |

**Table S2.** Cellular abundance and stability of the identified proteins and Sky1 known substrates.

| Spot <sup>&amp;</sup> | ID <sup>§</sup> | Gene                  | Molecules/Cell | Instability Index (*) | Classification |
|-----------------------|-----------------|-----------------------|----------------|-----------------------|----------------|
| 290                   | 2               | <i>ACS2; YLR153C</i>  | 225,000        | 32.03                 | stable         |
| 310                   | 3               | <i>MET6; YER091C</i>  | 264,000        | 33.76                 | stable         |
| 341                   | 6               | <i>STII; YOR027W</i>  | 67,600         | 39.66                 | stable         |
| 475                   | 8               | <i>UGP1; YKL035W</i>  | 17,200         | 31.06                 | stable         |
| 521                   | 9               | <i>SHM2; YLR058C</i>  | 67,600         | 27.27                 | stable         |
| 610                   | 10a             | <i>ADHI; YOL086C</i>  | not reported   | 20.71                 | stable         |
| 610                   | 10b             | <i>ARO4; YBR249C</i>  | 26,300         | 34.92                 | stable         |
| 537                   | 11              | <i>LYS20; YDL182W</i> | 28,100         | 32.87                 | stable         |
| 684                   | 15              | <i>ADO1; YJR105W</i>  | 22,200         | 21.59                 | stable         |
| 924                   | 19              | <i>YLR179C</i>        | 6230           | 34.17                 | stable         |
| 1052                  | 20              | <i>AHP1; YLR109W</i>  | 16,200         | 34.33                 | stable         |
| 824                   | 21              | <i>PRB1; YEL060C</i>  | 1600           | 32.36                 | stable         |
| 1010                  | 23              | <i>GUK1; YDR454C</i>  | 20,500         | 21.06                 | stable         |
| 865                   | 32              | <i>HSP26; YBR072W</i> | 19,300         | 48.11                 | unstable       |
| 1293                  | 36              | <i>PFY1; YOR122C</i>  | not reported   | 35.55                 | stable         |
| 761                   | 41              | <i>BMH1; YER177W</i>  | 158,000        | 57.99                 | unstable       |
| 927                   | 42              | <i>TMA19; YKL056C</i> | 27,800         | 22.18                 | stable         |
| Sky1 substrate        |                 | <i>NPL3; YDR432W</i>  | not reported   | 66.14                 | unstable       |
| Sky1 substrate        |                 | <i>GBP2; YCL011C</i>  | 2540           | 44.70                 | unstable       |

<sup>&</sup> Master protein spot number according to black numbers in Figure 1; <sup>§</sup> Identification protein number according to red number in Figure 1; \* In log phase SD medium.

**Figure S1.** Correlation of predicted and experimental pI.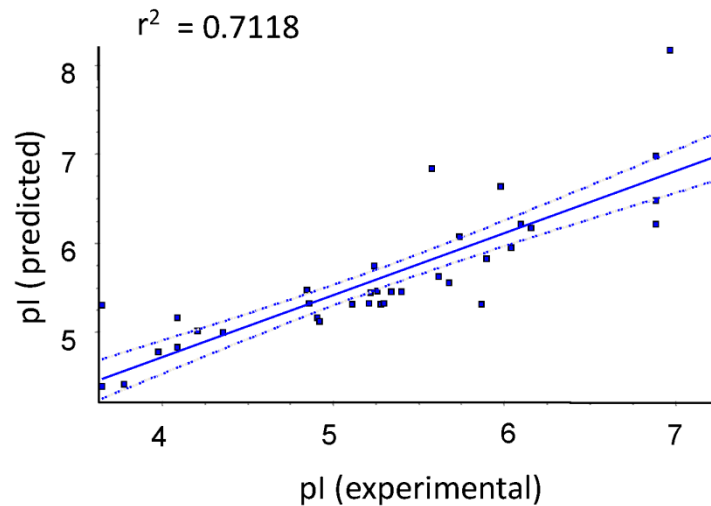

**Figure S2.** Control analyses and DIGE design. (A) Mono-dimensional silver-stained gel showing the different samples. 1–3, W303-1A without treatment; 4–6, W303-1A treated with cisplatin; 7–9,  $\Delta sky1$  without treatment; 10–12,  $\Delta sky1$  treated with cisplatin; (B) standard silver-stained DIGE gel; (C) Design of dyes staining.

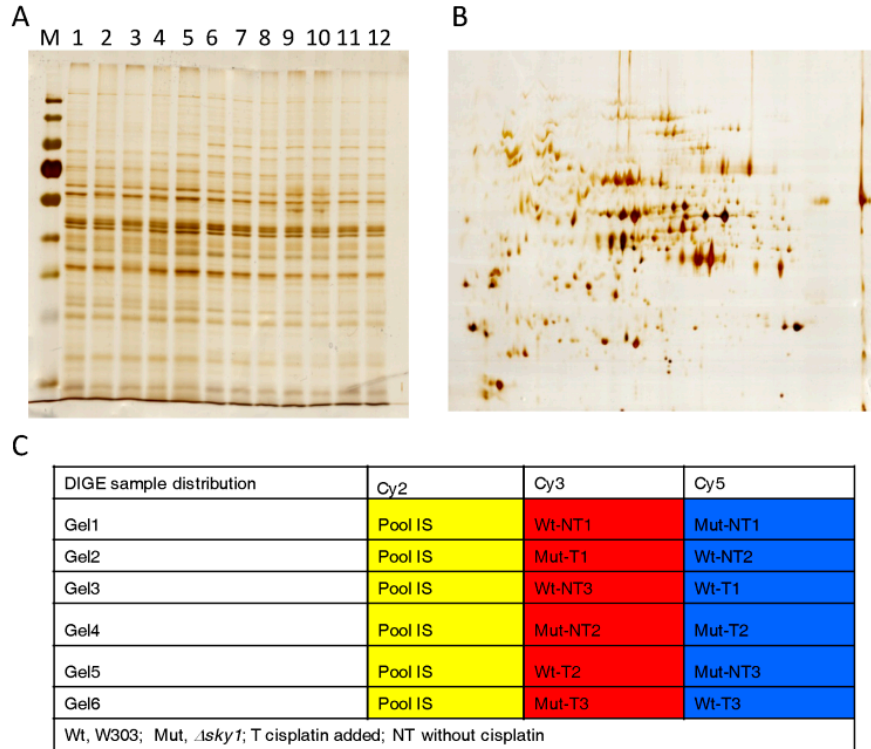

Supplement: ijms-15-12573-s001.pdf [file ijms-15-12573-s001.pdf]
